# Supplementary material
Source: HighWire-hosted journal article supplement (http://m.qualitysafety.bmj.com/highwire/filestream/147642/field_highwire_adjunct_files/0/bmjqs-2015-004828supp_appendix1.pdf)
Supplement: bmjqs-2015-004828supp_appendix1.pdf [file bmjqs-2015-004828supp_appendix1.pdf]

Appendix 1 List of triggers applied to eligible charts: percentage of charts positive for each trigger, relative risk (RR) and 95% confidence interval (CI), and diagnostic test criteria (sensitivity, specificity, positive predictive value (PPV), negative predictive value (NPV))

| Trigger number | Trigger description (ordered by frequency)                                                                                                                                                              | % with trigger | RR (95% CI)      | Sensitivity | Specificity | PPV   | NPV   |
|----------------|---------------------------------------------------------------------------------------------------------------------------------------------------------------------------------------------------------|----------------|------------------|-------------|-------------|-------|-------|
| 2              | Unplanned readmission after discharge from index admission                                                                                                                                              | 18.5%          | 3.2<br>(2.5-4.0) | 41.7%       | 85.1%       | 30.2% | 90.4% |
| 1              | Unplanned admission before index admission                                                                                                                                                              | 17.1%          | 2.5<br>(1.9-3.2) | 33.6%       | 85.5%       | 26.4% | 89.3% |
| 18             | Any other undesirable outcome not covered above                                                                                                                                                         | 9.3%           | 2.7<br>(2.1-3.6) | 21.8%       | 92.7%       | 31.5% | 88.4% |
| 9              | Other patient complication (e.g. acute myocardial infarction, stroke, pulmonary embolism, any unexpected complication that is not a natural progression of disease or an expected outcome of treatment) | 6.9%           | 3.7<br>(2.8-4.8) | 21.3%       | 95.4%       | 41.7% | 88.7% |
| 15             | Hospital-acquired infection or sepsis                                                                                                                                                                   | 6.5%           | 5.3<br>(4.3-6.7) | 27.0%       | 96.7%       | 55.9% | 89.5% |
| 3              | Hospital-incurred patient injury                                                                                                                                                                        | 5.5%           | 3.4<br>(2.6-4.6) | 16.6%       | 96.3%       | 40.7% | 88.2% |
| 4              | Adverse drug reaction                                                                                                                                                                                   | 5.1%           | 2.7<br>(2.0-3.8) | 12.8%       | 96.1%       | 33.8% | 87.7% |
| 16             | Dissatisfaction with care documented in the medical record                                                                                                                                              | 2.5%           | 2.2<br>(1.3-3.6) | 5.2%        | 97.9%       | 28.2% | 87.0% |
| 11             | Unexpected death                                                                                                                                                                                        | 1.3%           | 4.3<br>(2.8-6.5) | 5.2%        | 99.3%       | 55.0% | 87.1% |
| 5              | Unplanned transfer from general care to intensive care                                                                                                                                                  | 1.2%           | 4.5<br>(3.0-6.7) | 5.2%        | 99.4%       | 57.9% | 87.1% |
| 7              | Unplanned return to the operating theatre                                                                                                                                                               | 1.1%           | 4.8<br>(3.2-7.0) | 5.2%        | 99.5%       | 61.1% | 87.1% |
| 12             | Inappropriate discharge to home                                                                                                                                                                         | <1%            | 4.1<br>(2.5-6.9) | 3.3%        | 99.6%       | 53.8% | 86.9% |

|    |                                                              |               |                  |      |       |       |       |
|----|--------------------------------------------------------------|---------------|------------------|------|-------|-------|-------|
| 8  | Unplanned removal, injury or repair of organ during surgery  | <1%           | 4.7<br>(3.0-7.4) | 3.8% | 99.6% | 61.5% | 87.0% |
| 10 | Development of neurological deficit not present on admission | <1%           | 4.5<br>(2.7-7.3) | 3.3% | 99.6% | 58.3% | 86.9% |
| 13 | Cardiac or respiratory arrest                                | <1%           | 2.1<br>(0.7-7.0) | 0.9% | 99.6% | 28.6% | 86.7% |
| 6  | Unplanned transfer to another acute care hospital            | <1%           | 0                | <1%  | 99.9% | <1%   | 86.6% |
| 17 | Documentation or correspondence indicating litigation        | <1%           | 0                | <1%  | 99.9% | <1%   | 86.6% |
| 14 | Injury related to abortion or labour and delivery            | Not triggered | -                | -    | -     | -     | -     |
